# Supplementary material for: Knockout of inositol-requiring enzyme 1α in pro-opiomelanocortin neurons decreases fat mass via increasing energy expenditure
Source: PubMed Central journal article supplement (PMC5008012; doi:10.1098/rsob.160131), 2016-08-24

**Knockout of IRE1 $\alpha$  in POMC neurons decreases fat mass via increasing energy  
expenditure**

Yuzhong Xiao <sup>#</sup>, Tingting Xia <sup>#</sup>, Junjie Yu, Yalan Deng, Hao Liu, Bin Liu, Shanghai  
Chen, Yong Liu\*, and Feifan Guo\*

<sup>#</sup> Y. X. and T. X. contributed equally to this work.

Key Laboratory of Nutrition and Metabolism, Institute for Nutritional Sciences,  
Shanghai Institute for Biological Sciences, Chinese Academy of Sciences, University  
of Chinese Academy of Sciences, 320 Yueyang Road, Shanghai, China.

**Contact Information**

\*Correspondence should be addressed to Feifan Guo; E-mail: [ffguo@sibs.ac.cn](mailto:ffguo@sibs.ac.cn),

Address: 320 Yueyang Road, Shanghai, China 200031 or Yong Liu; E-mail:

[liuy@sibs.ac.cn](mailto:liuy@sibs.ac.cn), Address: 320 Yueyang Road, Shanghai, China 200031

E-mail: [ffguo@sibs.ac.cn](mailto:ffguo@sibs.ac.cn); Tel: 0086 21 5492 0250; Fax: 0086 21 5492 0291

[liuy@sibs.ac.cn](mailto:liuy@sibs.ac.cn); Tel: 0086 21 5492 0244; Fax: 0086 21 5492 0291

**Running title:** POMC IRE1 $\alpha$  regulates obesity

**Supplementary Figure 1. The distribution and counts of POMC neurons are not affected by IRE1 $\alpha$  deletion in POMC neurons.** (A) Representative immunofluorescence images of the arcuate nucleus (ARC), POMC neurons (red) (20 $\times$ ) 3V: third ventricle; (B) POMC neurons area; (C) POMC neurons distribution and number throughout ARC. All studies were conducted in 8-weeks old male POMC-Cre/Ai9 and PIKO/Ai9 mice maintained on a standard chow diet. Values are means  $\pm$  SEM (n = 4/group).

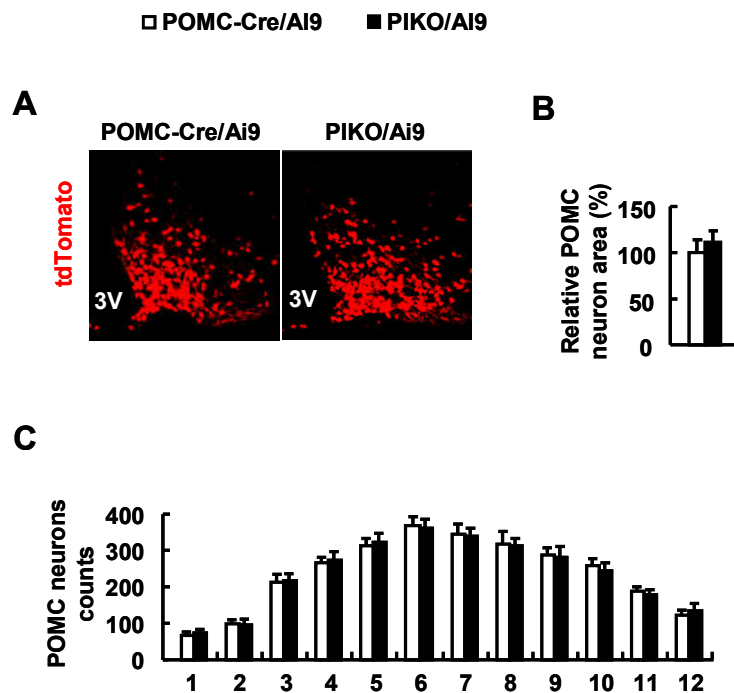

**Supplementary Figure 2. The function of the pituitary-adrenal axis is not affected by IRE1 $\alpha$  deletion in POMC neurons.** (A) Serum corticosterone levels under basal and stressed conditions; (B) Serum growth hormone levels; (C) Expression of representative pituitary genes in the pituitary; (D) Representative images of the pituitary, POMC expressing cells (red) (4 $\times$ ); (E) pituitary area. Studies

were conducted in 8-weeks old male control and PIKO mice maintained on a standard chow diet in A-C or in 8-weeks old male POMC-Cre/Ai9 mice and PIKO/Ai9 mice maintained on a standard chow diet in D and E. Values are means  $\pm$  SEM (n =6-7/group in A-C and n= 4/group in D-E).

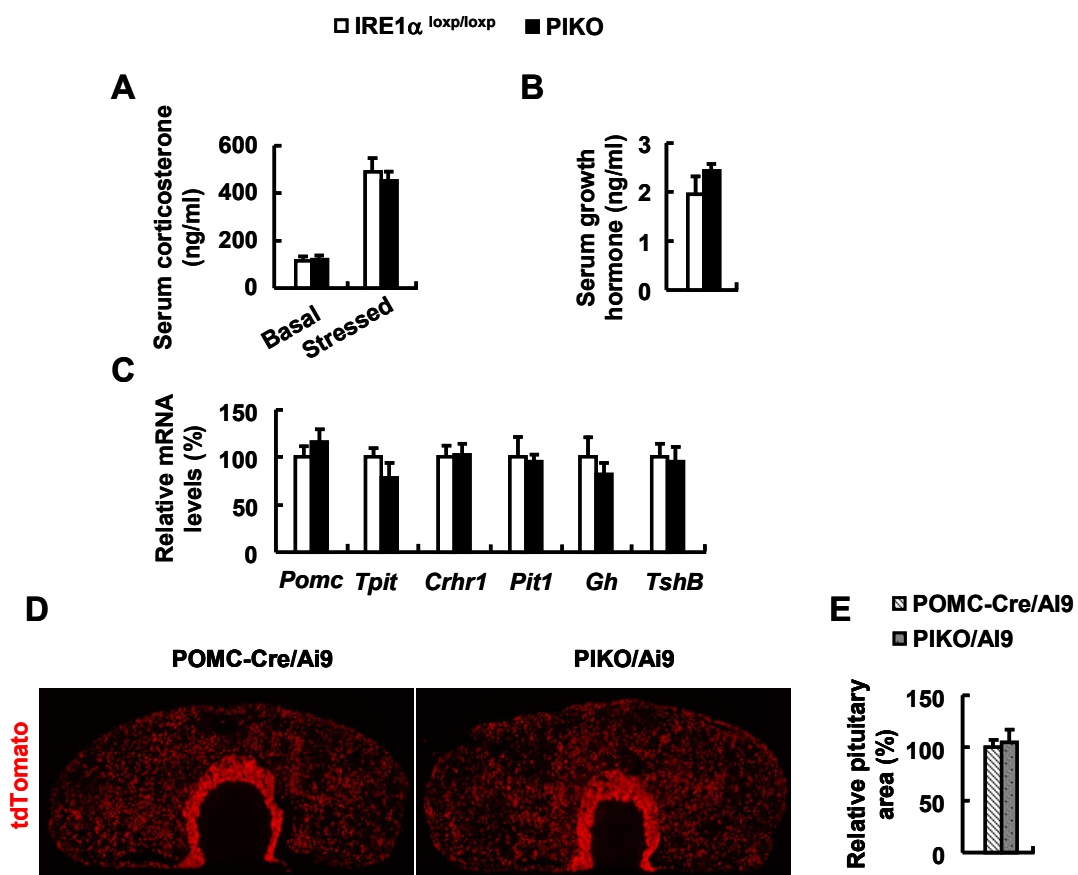

**Supplementary figure 3. The expression of feeding neuropeptides *Agrp*, *Npy* and *Cart* are not altered in the hypothalamus of PIKO mice.** (A and B) hypothalamic *Agrp*, *Npy* and *Cart* mRNA levels. All studies were conducted in male control and PIKO mice fed on a standard chow diet (NCD) or high-fat diet (HFD) for 16 weeks, starting from 6-weeks old. Values are means  $\pm$  SEM (n = 8-10/group).

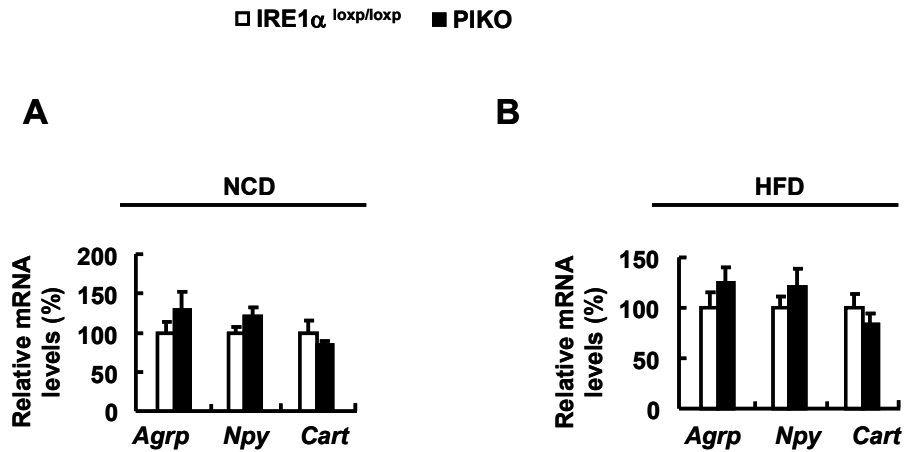

**Supplementary figure 4. The ER stress is ameliorated in the hypothalamus of PIKO mice under both a standard chow diet and high-fat diet (HFD).** (A) p-eIF2 $\alpha$ , BiP and ATF4 proteins in the hypothalamus (*left*, western blot; *right*, quantitative measurement of p-eIF2 $\alpha$ , BiP and ATF4 relative to total protein or actin); (B) Representative images showing immunofluorescence staining of ATF4 (green) in the arcuate nucleus (ARC) of mice (20 $\times$ ), 3V: third ventricle; (C) Quantification analysis of ATF4 in ARC. All studies were conducted in male control and PIKO mice fed on a standard chow diet (NCD) or HFD for 16 weeks, starting from 6-weeks old. Values are means  $\pm$  SEM (n = 8-10/group in A, n = 4/group in B-C), \*P < 0.05 for the effects of PIKO mice versus control mice in A and C, #P < 0.05 for the effects of HFD versus standard chow diet in the same genotype mice in A and C.

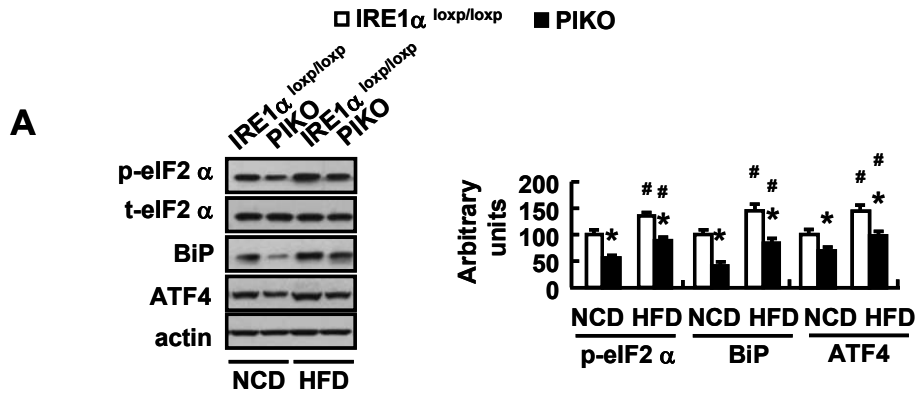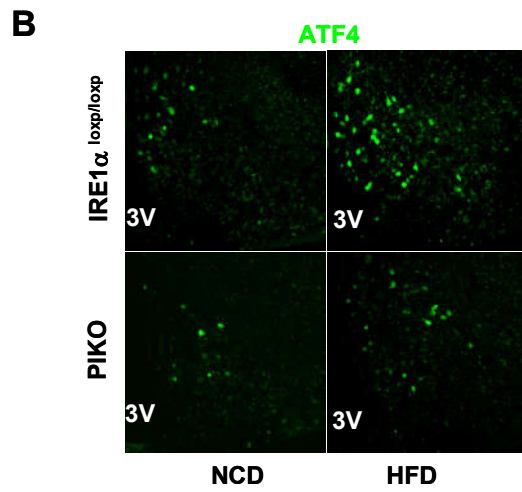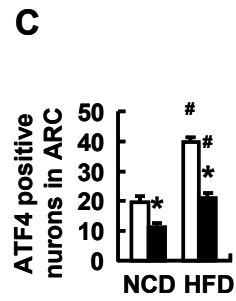

Supplement: rsob160131supp1.pdf [file rsob160131supp1.pdf]
